# Supplementary material
Source: publisher figshare collection journal article supplement (https://acs.figshare.com/ndownloader/files/20224290)
Supplement: Supplementary file 1 [file 20224290]

Supporting Information for:

# CO<sub>2</sub> Hydrogenation to CH<sub>3</sub>OH on Supported Cu Nanoparticles: Nature and Role of Ti in Bulk Oxides vs. Isolated Surface Sites

*Gina Noh,<sup>†</sup> Scott R. Docherty,<sup>†</sup> Erwin Lam,<sup>†</sup> Xing Huang,<sup>†,‡</sup> Deni Mance,<sup>†</sup> Jan L. Alfke,<sup>†</sup> Christophe Copéret<sup>\*,†</sup>*

<sup>†</sup> Department of Chemistry and Applied Biosciences and <sup>‡</sup> Scientific Center for Optical and Electron Microscopy, ETH Zürich, 8093 Zürich, Switzerland

**Figure S1.** Powder X-ray diffraction patterns for TiO<sub>2-120</sub> and Cu/TiO<sub>2</sub>

**Figure S2.** CO chemisorption isotherms for Cu/TiO<sub>2</sub> and Cu/TiO<sub>x</sub>-SiO<sub>2</sub>

**Figure S3.** Additional micrographs for Cu/TiO<sub>2</sub> during in situ reducing treatments.

**Figure S4.** Cu particle size histogram and sample micrograph for Cu/TiO<sub>2</sub>, introduced to the microscope under inert conditions

**Figure S5.** Cu particle size histograms and sample micrographs for Cu/SiO<sub>2</sub>, exposed to air for >12 h and then reduced in situ in the transmission electron microscope.

**Figure S6.** Cu particle size histogram and sample micrograph for Cu/TiO<sub>x</sub>-SiO<sub>2</sub>, introduced to the microscope under inert conditions or exposed to air for >12 h.

**Figure S7.** Cu particle size histogram and sample micrograph for Cu/Ti<sub>2</sub>@SiO<sub>2</sub>, introduced to the microscope under inert conditions

**Figure S8.** Cu particle size histogram and sample micrograph for Cu/Ti@SiO<sub>2</sub>, introduced to the microscope under inert conditions

**Figure S9.** Tauc plots for Ti-containing supports.

**Section S10.** Grafting and thermal treatment of a Ti<sup>III</sup> precursor on SiO<sub>2</sub>.

**Section S11.** Supplemental reaction data.

**Figure S14.** Pyridine desorption IR

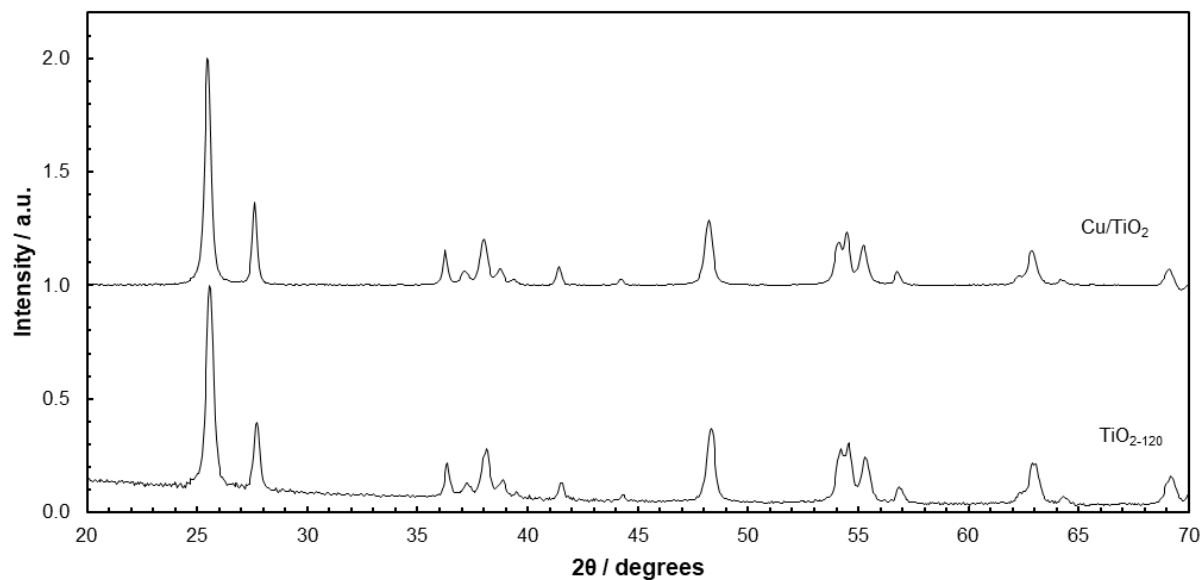

**Figure S1.** Powder X-ray diffraction patterns for TiO<sub>2-120</sub> (bottom; Degussa/Evonik P25) and Cu/TiO<sub>2</sub> (top). Patterns with and without Cu are identical, indicating that the TiO<sub>2</sub> support retains long-range order after dispersal of Cu nanoparticles and thermal treatments.

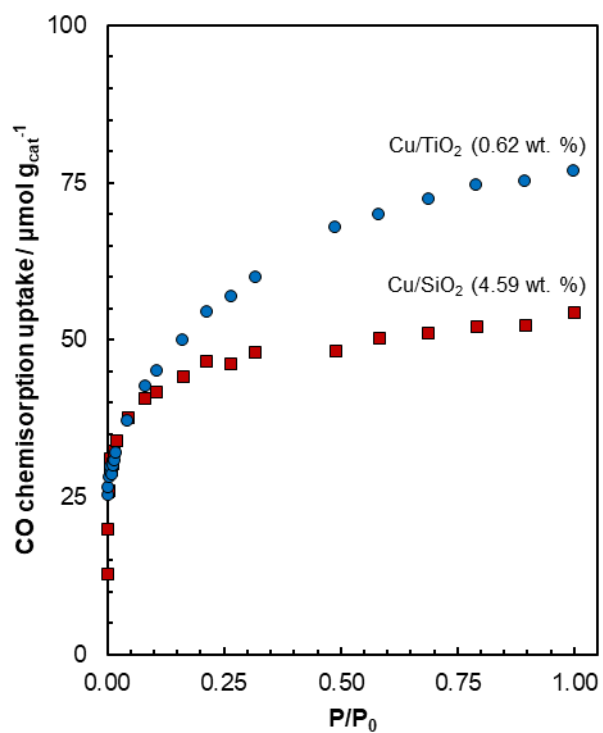

**Figure S2.** CO chemisorption isotherms for Cu/TiO<sub>2</sub> (blue) and Cu/SiO<sub>2</sub> (red) at 313 K. The specific CO uptake for Cu/TiO<sub>2</sub> is much greater than for Cu/SiO<sub>2</sub> in spite of having seven-fold less Cu per g<sub>cat</sub> (0.62 wt. % vs. 4.59 wt. %).

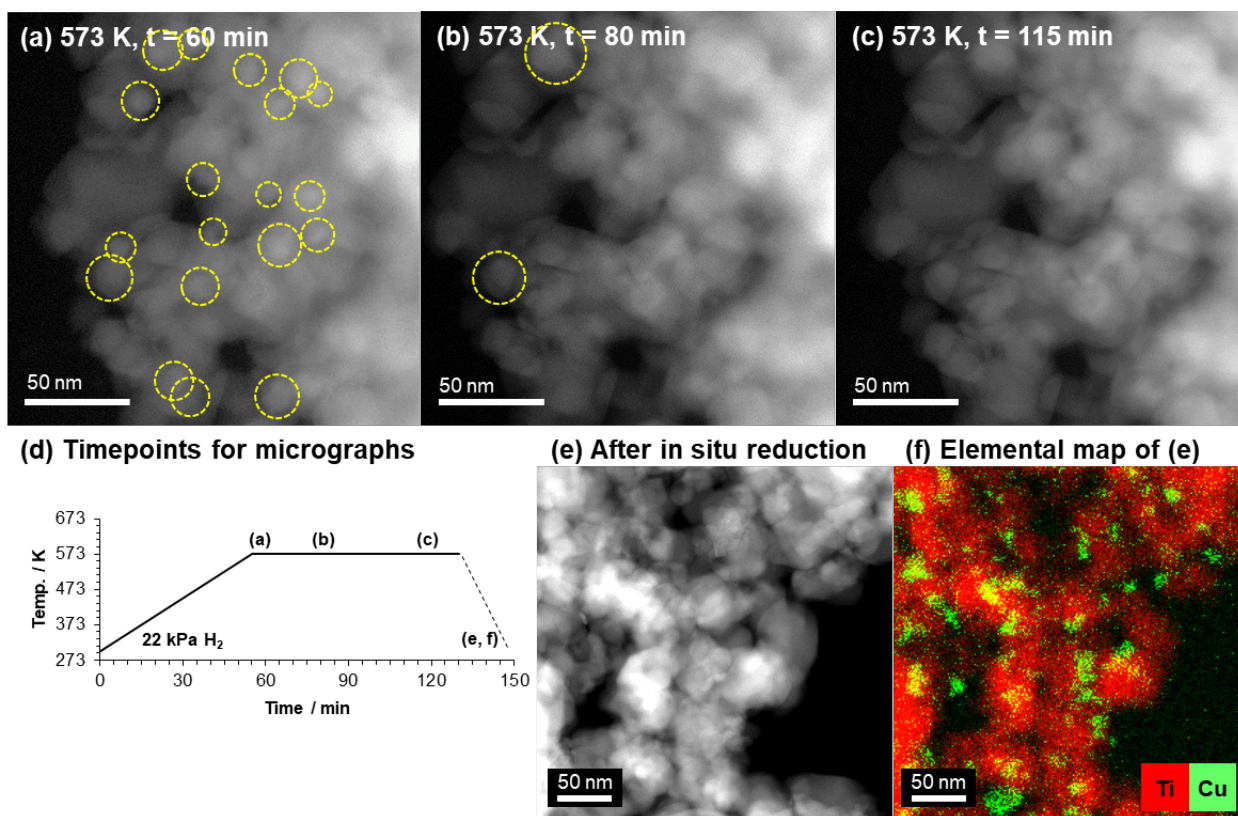

**Figure S3.** In situ reduction transmission electron microscopy experiment for Cu/TiO<sub>2</sub>. Timepoints for representative micrographs, taken in the same spot with the shutter closed between images to avoid beam damage, are shown in (a), (b), and (c). The yellow circles represent Cu particles where they remain discernible from the TiO<sub>2</sub> support. (d) Schematic of the conditions during in situ reduction experiments, indicating the timepoints for micrographs. (e) Representative micrograph after reduction, and (f) elemental mapping of (e) using EDX.

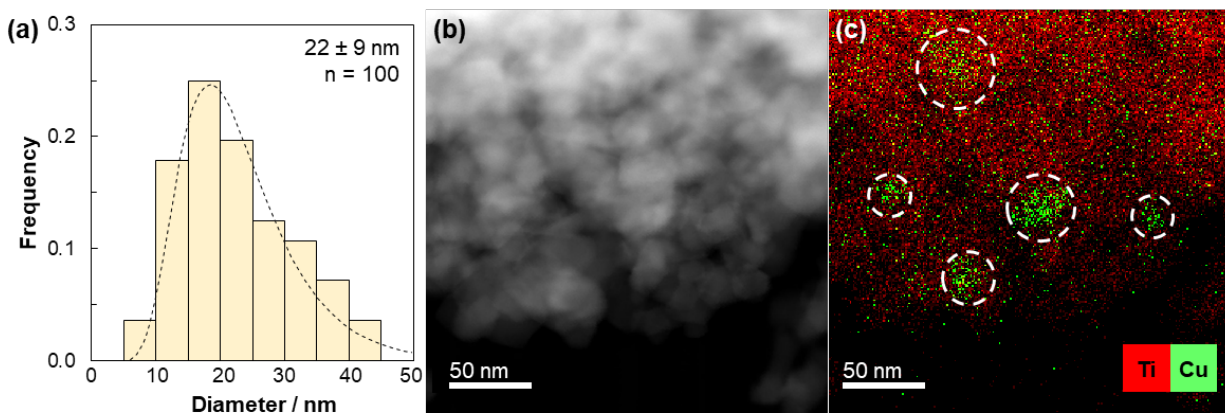

**Figure S4.** (a) Cu particle size histogram, (b) sample micrograph, and (c) elemental mapping using EDX, for Cu/TiO<sub>2</sub>, introduced to the microscope under inert conditions. Dashed line in (a) represents the fitted log-normal distribution.

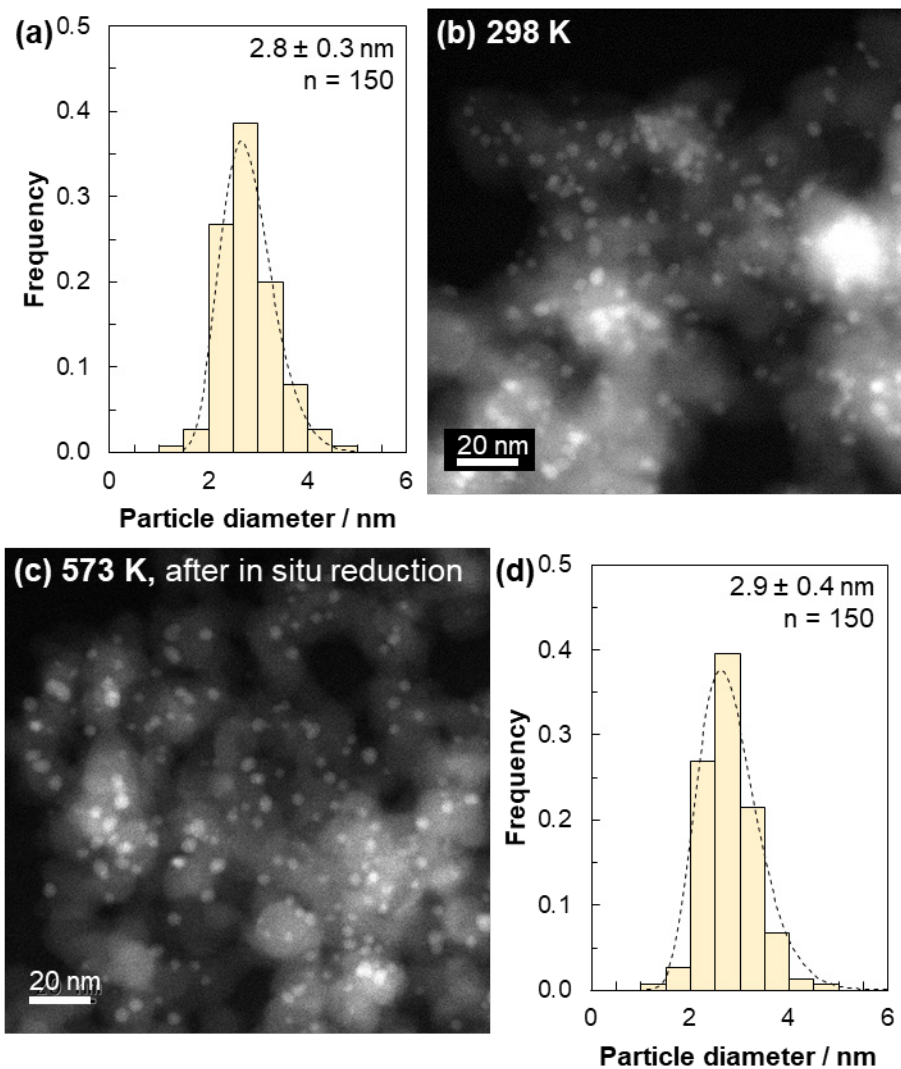

**Figure S5.** (a) Cu particle size histogram and (b) sample micrographs for Cu/SiO<sub>2</sub> exposed to air for >12 h prior to introduction to the microscope, and (c), (d) after *in situ* reduction treatment (573 K (5 K min<sup>-1</sup>) for 1 h, 22 kPa H<sub>2</sub>, 0.16 cm<sup>3</sup> min<sup>-1</sup>).

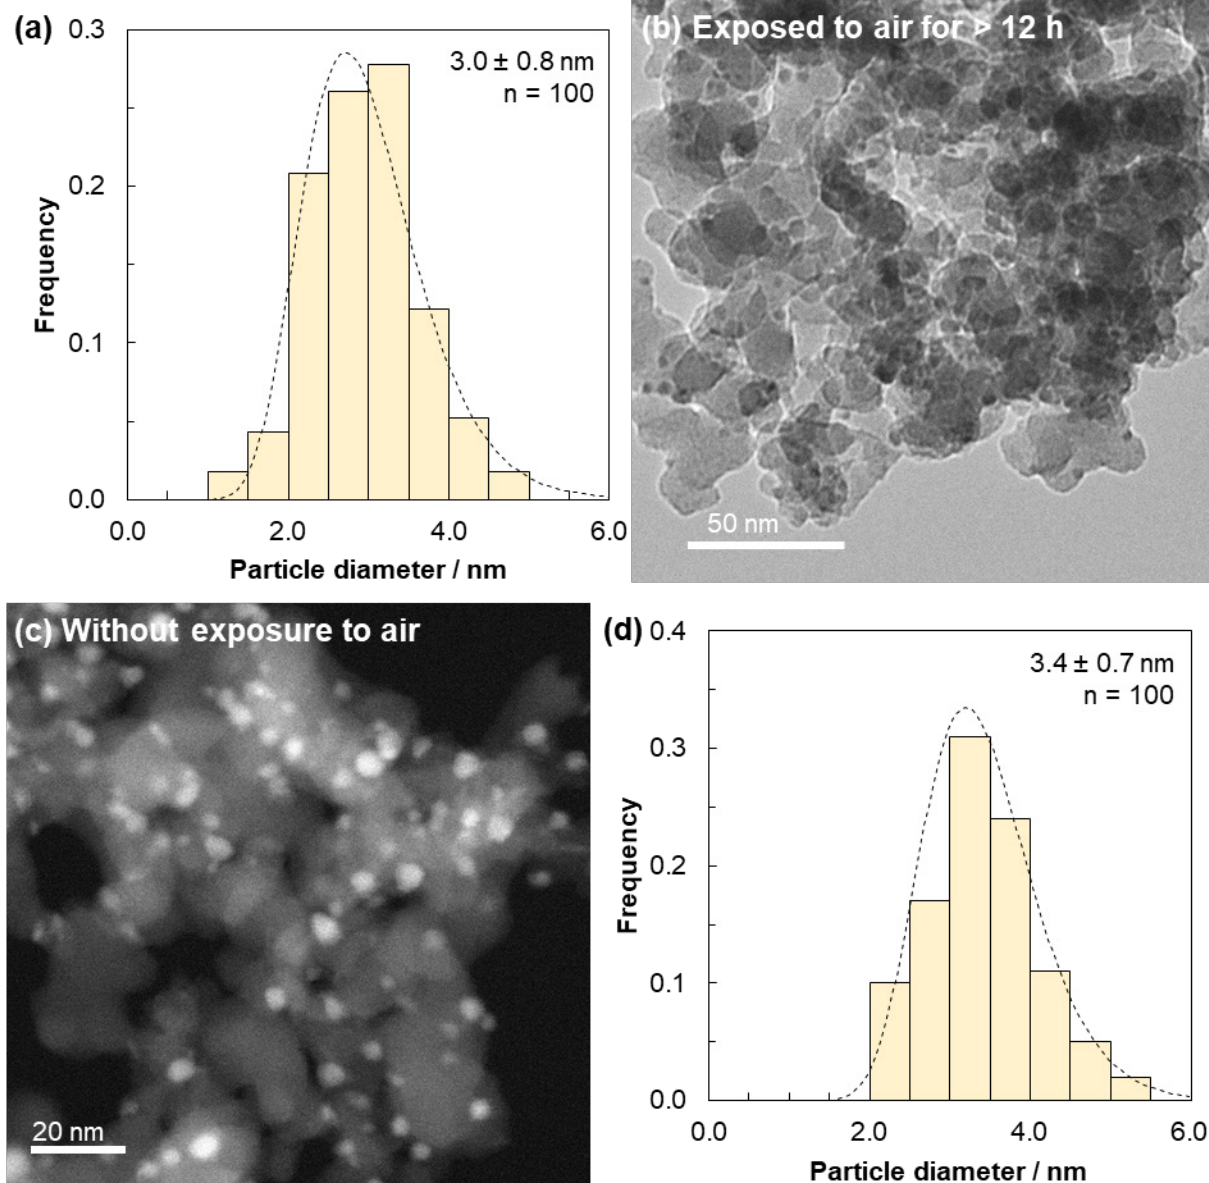

**Figure S6.** (a) Cu particle size histogram and (b) sample micrographs for Cu/TiO<sub>x</sub>-SiO<sub>2</sub> exposed to air for >12 h prior to introduction to the microscope, and (c), (d) for Cu/TiO<sub>x</sub>-SiO<sub>2</sub> transferred to the microscope without exposure to air. Bright-field images were obtained using a Hitachi HT7700 microscope (100 kV).

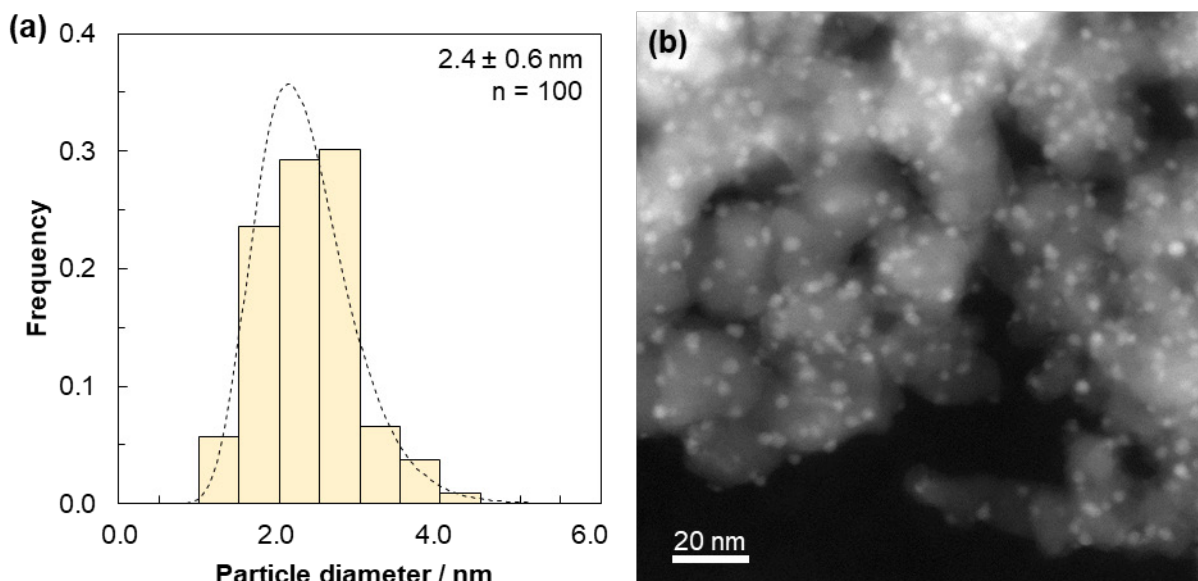

**Figure S7.** (a) Cu particle size histogram and (b) sample micrographs for Cu/Ti<sub>2</sub>@SiO<sub>2</sub> transferred to the microscope without exposure to air.

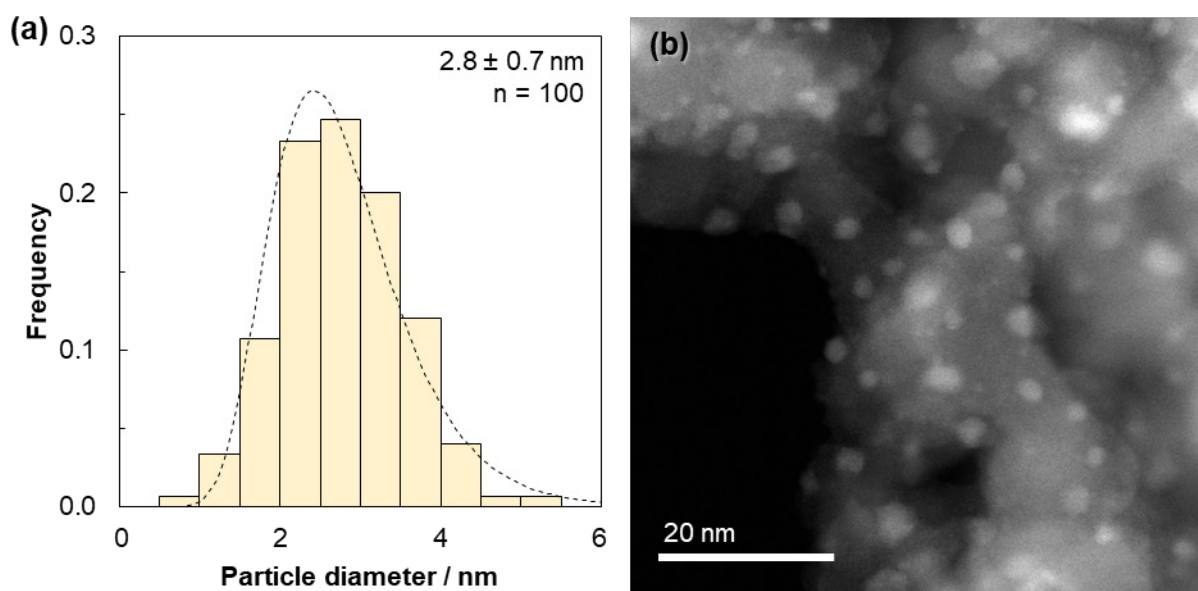

**Figure S8.** (a) Cu particle size histogram and (b) sample micrographs for Cu/Ti@SiO<sub>2</sub> transferred to the microscope without exposure to air. Micrographs of the materials exposed to air are included in previous work.<sup>1</sup>



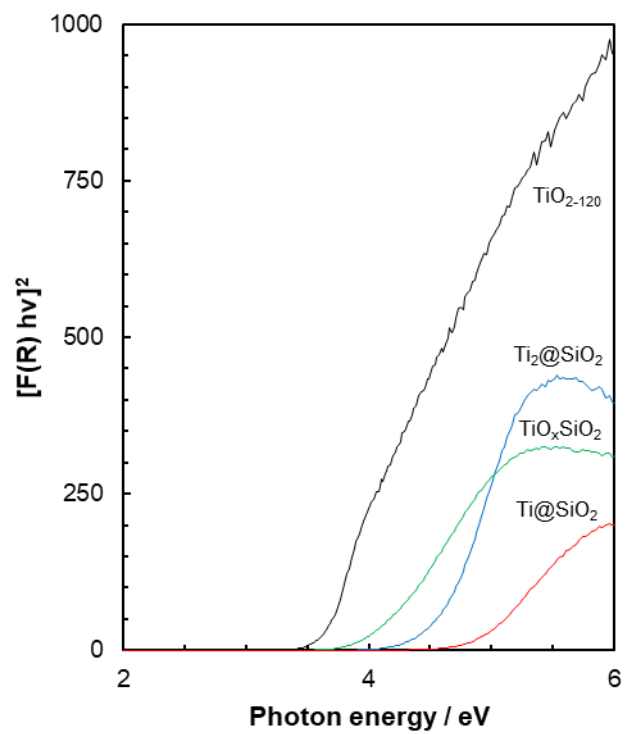

**Figure S9.** Tauc plot for Ti-containing supports. Values of the optical bandgap were obtained by extrapolating the linear region of the curves to zero  $[F(R) hv]^2$  values and are included in Table 1 of the main text.



**Section S10.** Grafting and thermal treatment of a  $\text{Ti}^{\text{III}}$  precursor on  $\text{SiO}_2$ .

To examine the stability of  $\text{Ti}^{\text{III}}$  metal centers dispersed on  $\text{SiO}_2$ , a  $\text{Ti}^{\text{III}}$  precursor ( $\text{Ti}(\text{OSi}(\text{O}^t\text{Bu})_3)_3$ , prepared according to literature procedures<sup>2</sup>) was grafted onto  $\text{SiO}_{2-700}$  then thermally treated. The material was examined using EPR spectroscopy (Figure S10). A solution of  $\text{Ti}(\text{OSi}(\text{O}^t\text{Bu})_3)_3$  in toluene (0.15 mmol; 20 mL) was added to a slurry of  $\text{SiO}_{2-700}$  (1 g) in toluene (10 mL) then stirred for 12 h; the slurry was allowed to settle, then the supernatant was decanted. The material was rinsed three times with toluene then dried under vacuum ( $\sim 10^{-3}$  Pa) at room temperature, followed by treatment under vacuum ( $\sim 10^{-3}$  Pa) at 773 K ( $0.083 \text{ K.s}^{-1}$ ) for 5 h.

The prominent EPR signal for  $\text{Ti}^{\text{III}}$  ( $g = 1.96$ ) disappears after thermal treatment. This suggests that the small amounts of water generated during decomposition of (O<sup>t</sup>Bu) ligands during thermal treatments are sufficient to oxidize  $\text{Ti}^{\text{III}}$  to  $\text{Ti}^{\text{IV}}$ , essentially irreversibly. The EPR spectrum for the material treated under reducing conditions (under  $\text{H}_2$  flow (101 kPa) at 773 K ( $0.083 \text{ K.s}^{-1}$ ) for 5 h) is identical to the spectrum for the material treated under vacuum.

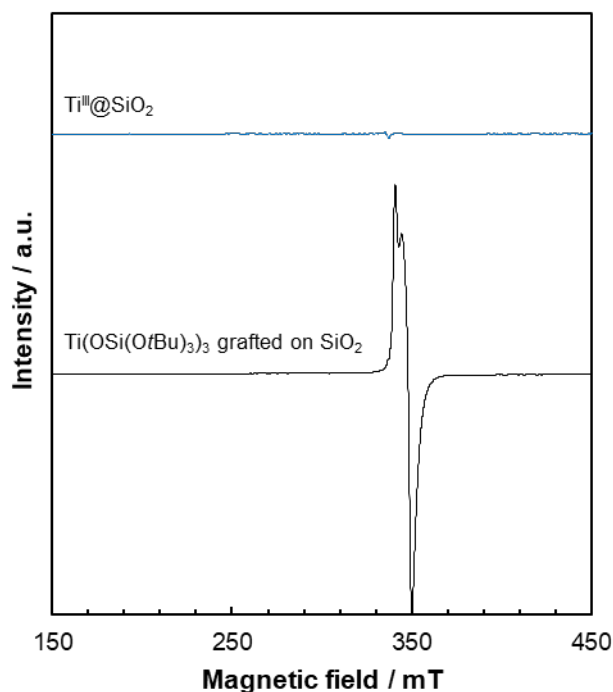

**Figure S10.** EPR spectra (100 K, X band) of  $\text{Ti}(\text{OSi}(\text{O}^t\text{Bu})_3)_3$  grafted on  $\text{SiO}_2$  (bottom) and after thermal treatment (top).

## Section S11. Supplemental catalytic reaction data

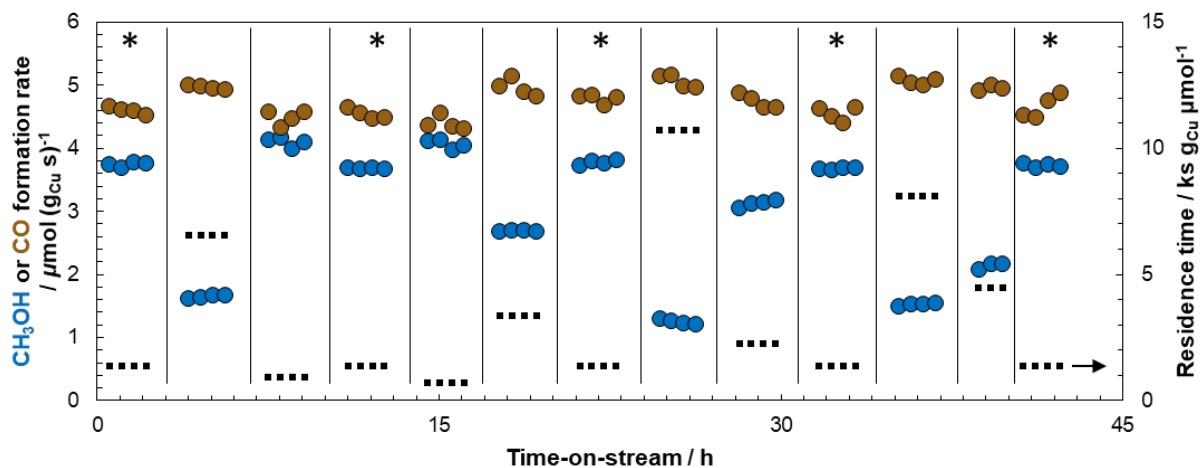

**Figure S11.** CH<sub>3</sub>OH (blue, left axis) and CO (brown, left axis) formation rates and CO<sub>2</sub> residence time (black, right axis) as a function of time-on-stream for CO<sub>2</sub> hydrogenation reactions on Cu/SiO<sub>2</sub> (503 K, 2.5 MPa total pressure; 1:3:1 CO<sub>2</sub>:H<sub>2</sub>:Ar).

\* Reference conditions used to monitor catalyst deactivation as a function of time-on-stream.

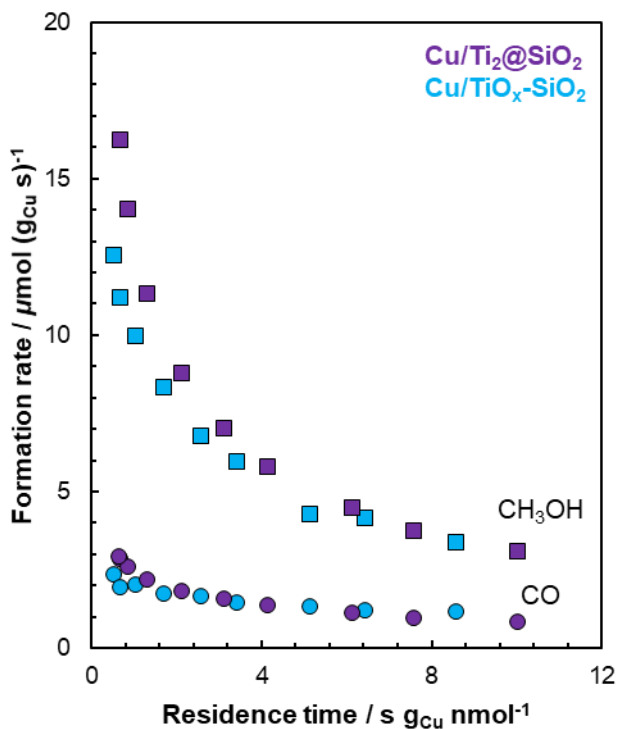

**Figure S12.** CH<sub>3</sub>OH (squares) and CO (circles) formation rates as a function of CO<sub>2</sub> residence time for Cu/Ti<sub>2</sub>@SiO<sub>2</sub> and Cu/TiO<sub>x</sub>-SiO<sub>2</sub> (503 K, 2.5 MPa total pressure; 1:3:1 CO<sub>2</sub>:H<sub>2</sub>:Ar).

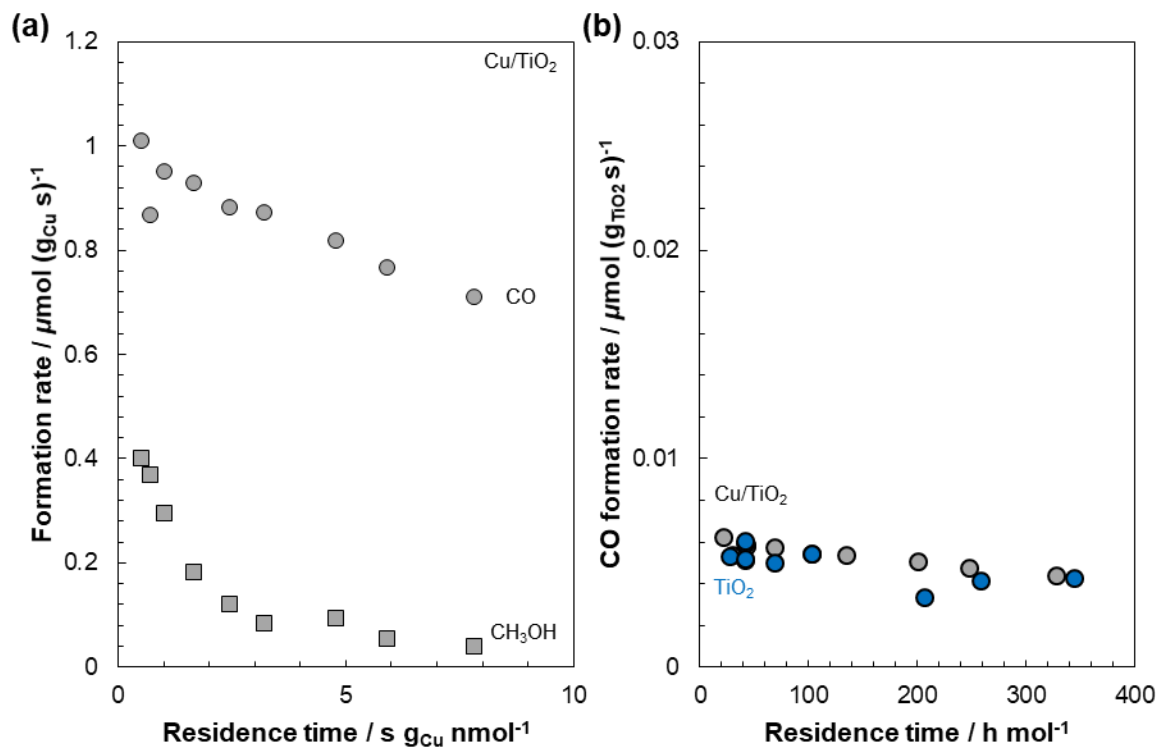

**Figure S13. (a)**  $\text{CH}_3\text{OH}$  (squares) and  $\text{CO}$  (circles) formation rates on  $\text{Cu/TiO}_2$ , normalized by mass of Cu.  $\text{CO}$  formation rates include contributions from the support. **(b)**  $\text{CO}$  formation rates, normalized by the mass of  $\text{TiO}_2$ , on  $\text{Cu/TiO}_2$  (grey) and  $\text{TiO}_2$  (blue). 503 K, 2.5 MPa total pressure; 1:3:1  $\text{CO}_2\text{:H}_2\text{:Ar}$ .

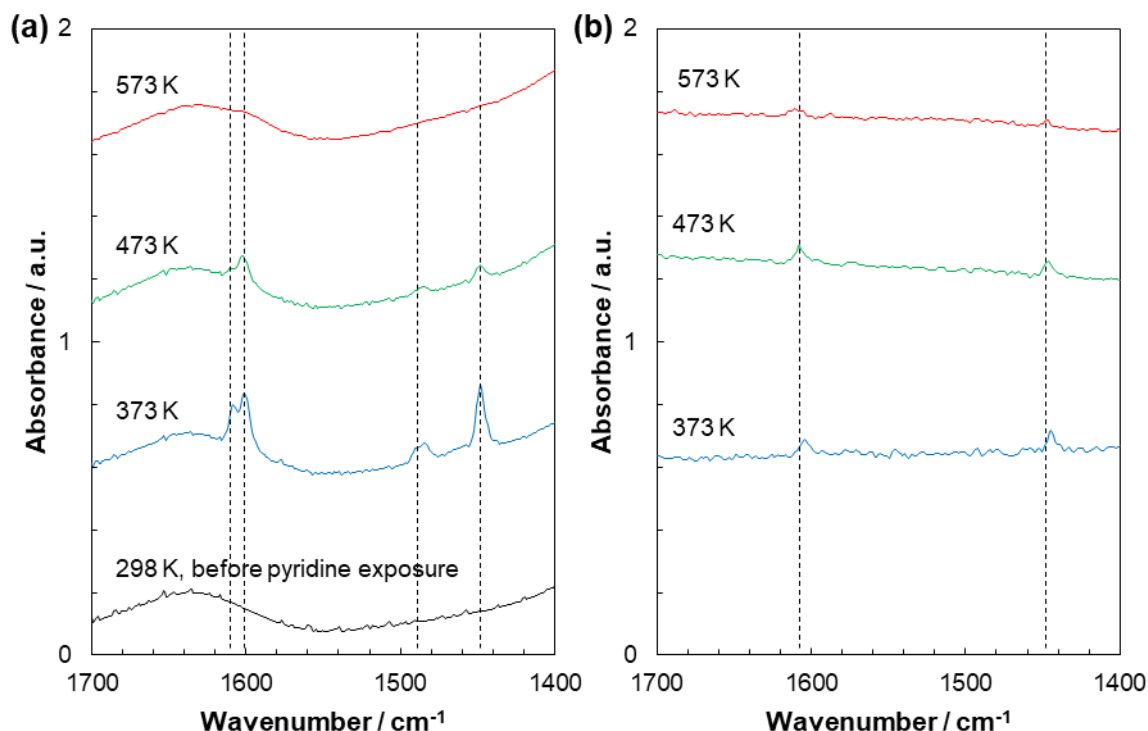

**Figure S14.** (a) Transmission IR spectra for Cu/Ti@SiO<sub>2</sub> and (b) ATR IR spectra for Cu/TiO<sub>2</sub> after exposure of the sample to pyridine (0.2 Pa at 298 K for 5 min), followed by evacuating ( $\sim 10^{-3}$  Pa) at 373 K (blue line), 473 K (green line), and 573 K (red line) for 15 minutes. Dashed lines highlight pyridine vibrational bands.

## References

- (1) Noh, G.; Lam, E.; Alfke, J. L.; Larmier, K.; Searles, K.; Wolf, P.; Copéret, C. Selective Hydrogenation of CO<sub>2</sub> to CH<sub>3</sub>OH on Supported Cu Nanoparticles Promoted by Isolated Ti<sup>IV</sup> Surface Sites on SiO<sub>2</sub>. *ChemSusChem* **2019**, 12 (5), 968–972.
- (2) Allouche, F. Structure – Activity Relationship in Olefin Polymerization with Well-Defined Ti(III) and Ln(II) Molecular and Surface Complexes, ETH Zurich, 2018.
